# Supplementary material for: Neck Active Movements Assessment in Women with Episodic and Chronic Migraine
Source: MDPI journal article supplement (doi:10.3390/jcm10173805), 2021-08-25
Supplement: s1 [file s1]

**Table S1.** Cervical range of motion (degrees) of the three groups stratified according to the history of neck pain (mean and standard deviation)

|                         | Control group (27) |                | Episodic migraine (27) |                | Chronic migraine (27) |                |
|-------------------------|--------------------|----------------|------------------------|----------------|-----------------------|----------------|
|                         | No neck pain (20)  | Neck pain (7)  | No neck pain (9)       | Neck pain (18) | No neck pain (6)      | Neck pain (21) |
| Total range of motion*† | 309.28 (27.90)     | 314.86 (31.62) | 288.63 (43.20)         | 276.00 (34.05) | 282.50 (32.76)        | 280.12 (51.47) |
| Flexion                 | 56.90 (7.09)       | 61.28 (5.55)   | 57.00 (9.88)           | 52.20 (6.00)   | 59.94 (11.12)         | 54.19 (13.04)  |
| Extension               | 59.51 (7.24)       | 60.42 (8.71)   | 54.29 (9.25)           | 53.77 (10.19)  | 53.11 (7.53)          | 55.80 (10.18)  |
| Right lateral flexion   | 51.85 (8.58)       | 50.90 (7.87)   | 47.70 (9.30)           | 45.54 (6.45)   | 47.16 (9.98)          | 46.46 (9.98)   |
| Left lateral flexion    | 51.36 (8.48)       | 49.90 (5.11)   | 47.81 (8.60)           | 45.18 (8.19)   | 43.72 (3.22)          | 43.30 (11.89)  |
| Right rotation          | 73.15 (8.51)       | 72.76 (9.12)   | 66.62 (8.70)           | 64.33 (9.71)   | 66.77 (20.08)         | 65.65 (12.98)  |
| Left rotation           | 68.35 (11.46)      | 70.47 (14.02)  | 62.88 (14.53)          | 60.50 (11.24)  | 58.94 (11.73)         | 61.17 (17.01)  |

\*p<0.05 chronic migraine vs. control group; † p<0.05 episodic migraine vs. control group

**Table S2.** Cervical range of motion (degrees) of the three groups stratified according to the presence of neck pain during active movement (mean and standard deviation)

|                       | Control group (27) |                        | Episodic migraine (27) |                        | Chronic migraine (27) |                        |
|-----------------------|--------------------|------------------------|------------------------|------------------------|-----------------------|------------------------|
|                       | No neck pain       | Neck pain <sup>a</sup> | No neck pain           | Neck pain <sup>b</sup> | No neck pain          | Neck pain <sup>c</sup> |
| Total range of motion | NA                 | NA                     | NA                     | NA                     | NA                    | NA                     |
| Flexion               | 57.13 (6.50)       | 65.22 (6.88)           | 53.91 (7.48)           | 53.16 (9.95)           | 58.62 (9.37)          | 50.10 (16.03) *†       |
| Extension             | 59.86 (7.71)       | 58.88 (6.61)           | 54.83 (10.06)          | 52.18 (9.28)           | 54.78 (6.20)          | 55.66 (12.54)          |
| Right lateral flexion | 51.88 (8.28)       | 48.16 (10.13)          | 45.97 (7.68)           | 47.09 (7.07)           | 45.45 (7.69)          | 47.87 (11.85)          |
| Left lateral flexion  | 51.76 (7.63)       | 44.77 (5.71)           | 46.09 (7.81)           | 45.93 (11.08)          | 41.94 (6.97)          | 44.55 (12.81)          |
| Right rotation        | 73.26 (8.67)       | 70.33 (7.54)           | 65.88 (9.32)           | 62.33 (9.44)           | 67.48 (15.00)         | 63.91 (14.00)          |
| Left rotation         | 69.80 (11.93)      | 57.66 (3.30)           | 61.68 (11.91)          | 59.08 (15.60)          | 63.78 (12.14)         | 55.40 (20.27)          |

\*p <0.05 vs no neck pain chronic migraine; †p<0.05 vs neck pain control group

<sup>a</sup> number of subjects with neck pain during each cervical movement in the control group: flexion = 3; extension = 3; right lateral flexion = 2; left lateral flexion = 3; right rotation = 2; left rotation = 2. <sup>b</sup> number of subjects with neck pain during each cervical movement in the episodic migraine group: flexion = 4; extension = 9; right lateral flexion = 7; left lateral flexion = 5; right rotation = 6; left rotation = 4. <sup>c</sup> number of subjects with neck pain during each cervical movement in the chronic migraine group: flexion = 10; extension = 13; right lateral flexion = 13; left lateral flexion = 15; right rotation = 12; left rotation = 10. NA = not available, due to the different number of subjects who reported pain during each movement

**Table S3.** Angular velocity (degrees/s) of the three groups stratified according to the history of neck pain (mean and standard deviation)

|                                               | Control group (27) |               | Episodic migraine (27) |                | Chronic migraine (27) |               |
|-----------------------------------------------|--------------------|---------------|------------------------|----------------|-----------------------|---------------|
|                                               | No neck pain (20)  | Neck pain (7) | No neck pain (9)       | Neck pain (20) | No neck pain (7)      | Neck pain (9) |
| Mean angular velocity of cervical movements * | 27.11 (4.37)       | 25.12 (5.36)  | 21.77 (5.88)           | 23.11 (4.14)   | 21.10 (4.86)          | 22.37 (6.16)  |
| Flexion                                       | 27.87 (5.22)       | 26.81 (6.40)  | 23.44 (6.06)           | 23.12 (4.68)   | 23.88 (6.04)          | 22.76 (7.78)  |
| Extension                                     | 34.94 (6.11)       | 33.43 (6.51)  | 29.69 (7.18)           | 28.86 (6.43)   | 26.31 (14.41)         | 27.59 (9.30)  |
| Right lateral flexion *                       | 23.40 (5.54)       | 22.09 (4.83)  | 18.08 (5.22)           | 20.45 (4.68)   | 15.02 (8.42)          | 19.46 (6.12)  |
| Left lateral flexion                          | 23.37 (5.75)       | 21.47 (5.99)  | 18.09 (4.29)           | 19.71 (5.49)   | 18.45 (4.36)          | 17.95 (7.69)  |
| Right rotation                                | 31.44 (5.34)       | 27.37 (6.44)  | 25.47 (6.79)           | 26.66 (6.48)   | 27.26 (13.86)         | 26.21 (8.22)  |
| Left rotation *†                              | 31.35 (5.46)       | 29.00 (7.01)  | 23.89 (8.50)           | 25.47 (5.57)   | 20.67 (9.02)          | 25.97 (6.82)  |

\*p<0.05 chronic migraine vs. control group; † p<0.05 episodic migraine vs. control group

**Table S4.** Angular velocity (degrees/s) of the three groups stratified according to the presence of neck pain during active movement (mean and standard deviation)

|                                             | Control group (27) |                        | Episodic migraine (27) |                        | Chronic migraine (27) |                        |
|---------------------------------------------|--------------------|------------------------|------------------------|------------------------|-----------------------|------------------------|
|                                             | No neck pain       | Neck pain <sup>a</sup> | No neck pain           | Neck pain <sup>b</sup> | No neck pain          | Neck pain <sup>c</sup> |
| Mean angular velocity of cervical movements | NA                 | NA                     | NA                     | NA                     | NA                    | NA                     |
| Flexion *†                                  | 26.72 (5.54)       | 30.71 (2.85)           | 23.66 (4.76)           | 20.77 (6.86)           | 24.48 (5.25)          | 20.50 (9.77)           |
| Extension                                   | 25.98 (5.41)       | 20.08 (3.26)           | 22.84 (5.96)           | 22.43 (5.73)           | 22.54 (4.39)          | 21.74 (4.88)           |
| Right lateral flexion                       | 23.15 (5.51)       | 21.97 (0.67)           | 19.71 (5.09)           | 19.52 (4.65)           | 17.03 (6.38)          | 20.03 (7.11)           |
| Left lateral flexion                        | 23.21 (5.81)       | 20.23 (5.55)           | 19.04 (4.44)           | 19.75 (8.06)           | 16.78 (7.42)          | 19.09 (6.76)           |
| Right rotation                              | 30.17 (5.86)       | 32.98 (6.27)           | 26.82 (7.09)           | 24.29 (3.35)           | 29.26 (9.97)          | 22.91 (7.72)           |
| Left rotation                               | 31.00 (6.01)       | 27.58 (1.18)           | 25.23 (6.36)           | 23.31 (8.53)           | 24.60 (9.64)          | 23.92 (9.06)           |

\*p<0.05 chronic migraine vs. control group; † p<0.05 episodic migraine vs. control group

<sup>a</sup> number of subjects with neck pain during each cervical movement in the control group: flexion = 3; extension = 3; right lateral flexion = 2; left lateral flexion = 3; right rotation = 2; left rotation = 2. <sup>b</sup> number of subjects with neck pain during each cervical movement in the episodic migraine group: flexion = 4; extension = 9; right lateral flexion = 7; left lateral flexion = 5; right rotation = 6; left rotation = 4. <sup>c</sup> number of subjects with neck pain during each cervical movement in the chronic migraine group: flexion = 10; extension = 13; right lateral flexion = 13; left lateral flexion = 15; right rotation = 12; left rotation = 10. NA = not available, due to the different number of subjects who reported pain during each movement
